# Supplementary material for: Tuning the through-space charge transfer emission in triarylborane and triarylamine functionalized dipeptide organogels
Source: Royal Society of Chemistry journal article supplement (doi:10.1039/d1sm01636a), 2022-01-01
Supplement: d1sm01636a1.pdf [file d1sm01636a1.pdf]

**Tuning the Through-Space Charge Transfer  
Emission in Triarylborane and Triarylamine  
Functionalized Dipeptide Organogels  
Supporting Information**

*Yu Wang, † Bowen Wang, † Kanglei Liu, † Xiaodong Yin, † Pangkuan Chen, † Nan  
Wang\*†*

† Key Laboratory of Cluster Science of Ministry of Education, Beijing Key Laboratory  
of Photoelectronic/Electrophotonic Conversion Materials, School of Chemistry and  
Chemical Engineering, Beijing Institute of Technology, Beijing 100081, P. R. China

**Table of Contents**

S1. Gel and Photophysical Properties

S2. NMR and HRMS Spectra

## S1. Gelation Properties

Table S1. Results of the gelation studies with **B1** and **N1** in aliphatic and aromatic solvents. <sup>a</sup> (All compounds were heated to completely dissolve and then cooled to room temperature.)

| Solvent          | Status                       |                              |
|------------------|------------------------------|------------------------------|
|                  | <b>N1</b> (MGC) <sup>b</sup> | <b>B1</b> (MGC) <sup>b</sup> |
| Benzene          | G (20%)                      | S                            |
| Toluene          | G (20%)                      | S                            |
| o-xylene         | G (20%)                      | S                            |
| m-xylene         | G (20%)                      | S                            |
| p-xylene         | G (20%)                      | S                            |
| Mesitylene       | G (20%)                      | S                            |
| Trichloromethane | G (20%)                      | S                            |
| Ether            | G (20%)                      | I                            |
| acetone          | G (20%)                      | S                            |

<sup>a</sup> G : gel; S : solution; I : insoluble; <sup>b</sup> MGC : minimum gelation concentration

Table S2. Results of the gelation studies with **B2** and **N2** in aliphatic and aromatic solvents.<sup>a</sup> (All compounds were heated to completely dissolve and then cooled to room temperature.)

| Solvent          | Status                       |                              |
|------------------|------------------------------|------------------------------|
|                  | <b>N2</b> (MGC) <sup>b</sup> | <b>B2</b> (MGC) <sup>b</sup> |
| Trichloromethane | S                            | S                            |
| Ether            | I                            | I                            |
| Acetone          | S                            | S                            |
| Benzene          | G (1.5 %)                    | S                            |
| Toluene          | G (1.5 %)                    | S                            |
| o-xylene         | G (1.5 %)                    | G (1.5 %)                    |
| m-xylene         | G (1.0 %)                    | G (2.0 %)                    |
| p-xylene         | G (1.0 %)                    | G (1.0 %)                    |
| Mesitylene       | G (1.0 %)                    | G (0.5 %)                    |

<sup>a</sup> G : gel; S : solution; I : insoluble; <sup>b</sup> MGC : minimum gelation concentration

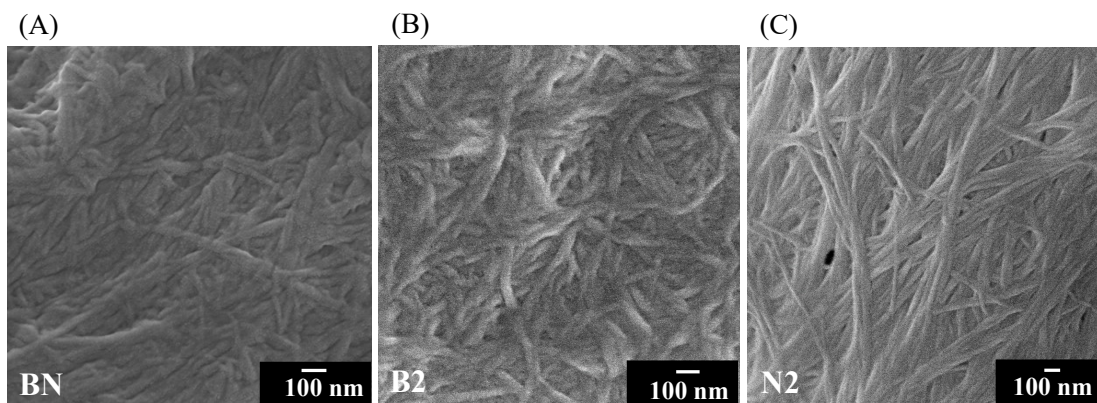

Figure S1. SEM images of the single gels in mesitylene (wt.% = 2%): (A) **BN**, (B) **B2** and (C) **N2**.

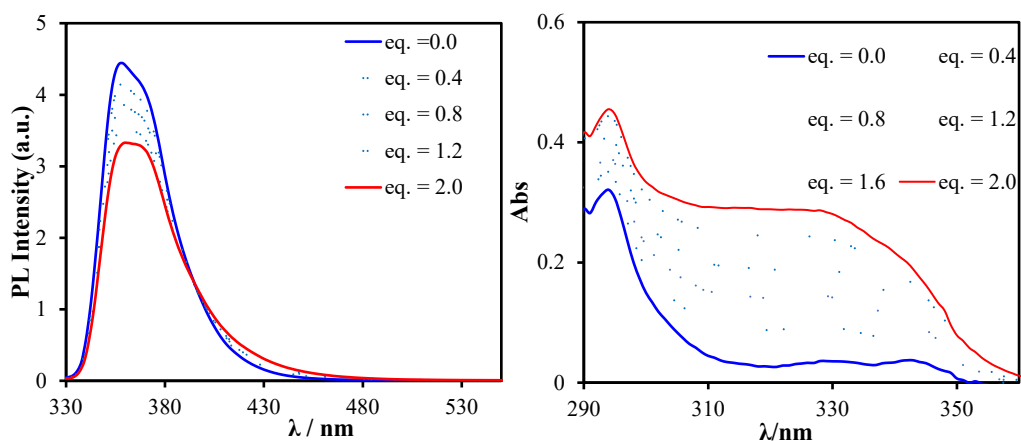

Figure S2. Emission (left) and Absorption (right) spectral change of **N2** with the addition of **B2** in mesitylene ( $1.0 \times 10^{-5}$  M).

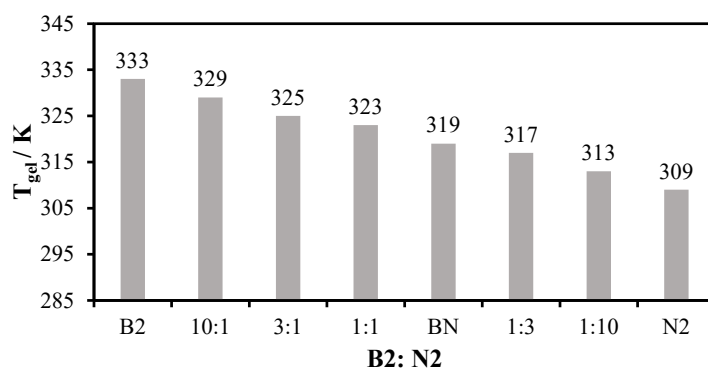

Figure S3. Sol-gel transition temperature ( $T_{gel}$ ) of binary gels with different **B2** to **N2** ratios in mesitylene (wt.% = 2%) (Single component **B2**<sub>(gel)</sub>, **N2**<sub>(gel)</sub> and **BN**<sub>(gel)</sub> are included as controls).

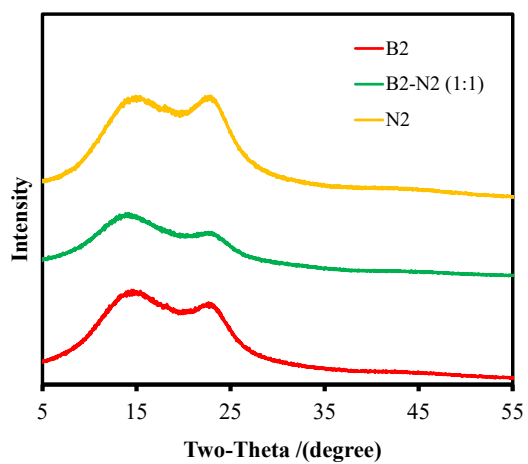

Figure S4. XRD patterns of xerogels in the region of 1-55°.

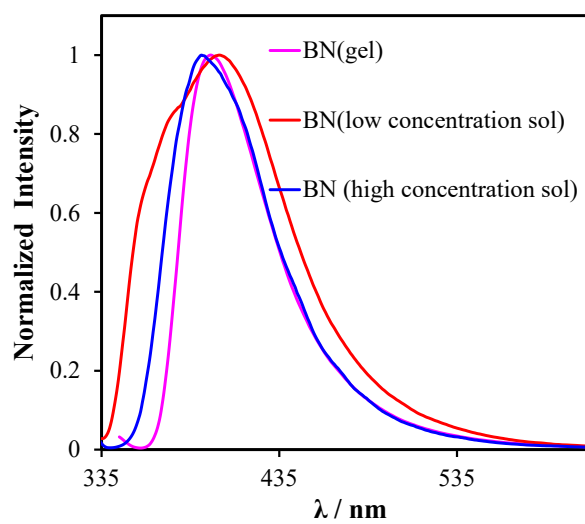

Figure S5. Emission spectra of **BN** in mesitylene at different concentrations (pink: gel state; red:  $C = 10^{-5} \text{ M}$ ; blue:  $c = 10^{-3} \text{ M}$ ).

## S2. NMR and HRMS Spectra

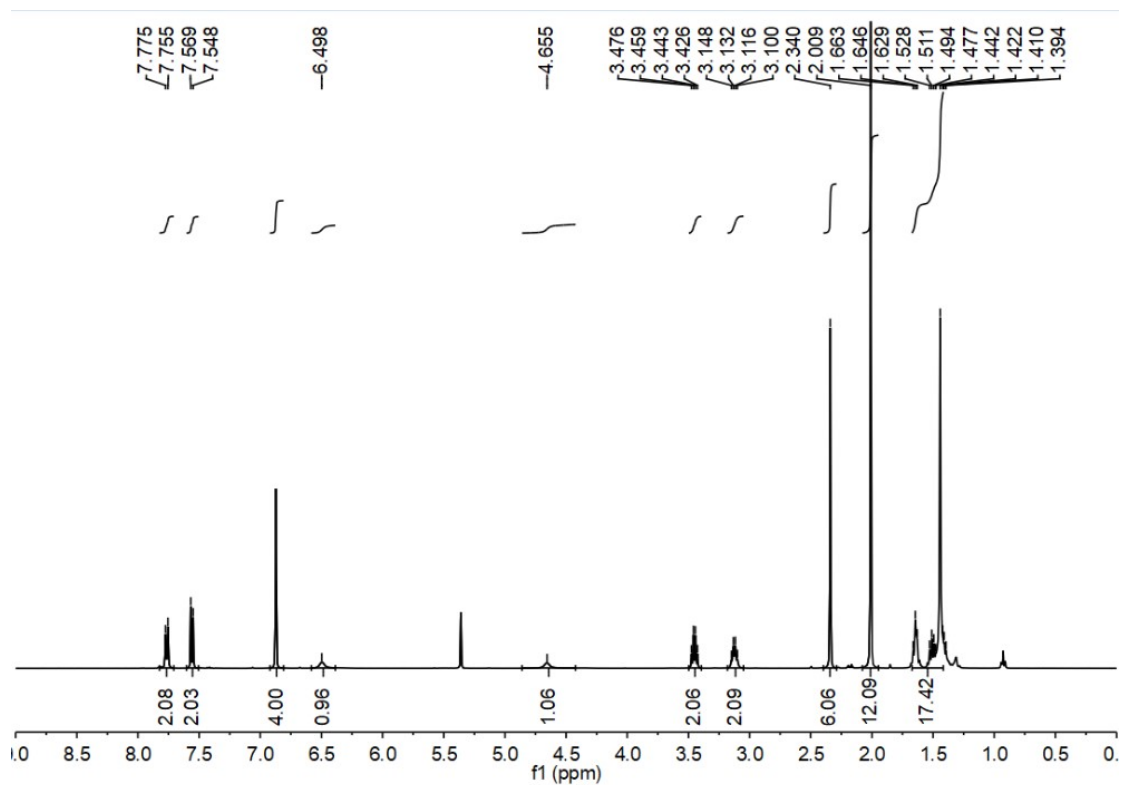

Figure S6. <sup>1</sup>H NMR (400 MHz, CD<sub>2</sub>Cl<sub>2</sub>) spectrum of **1-2**.

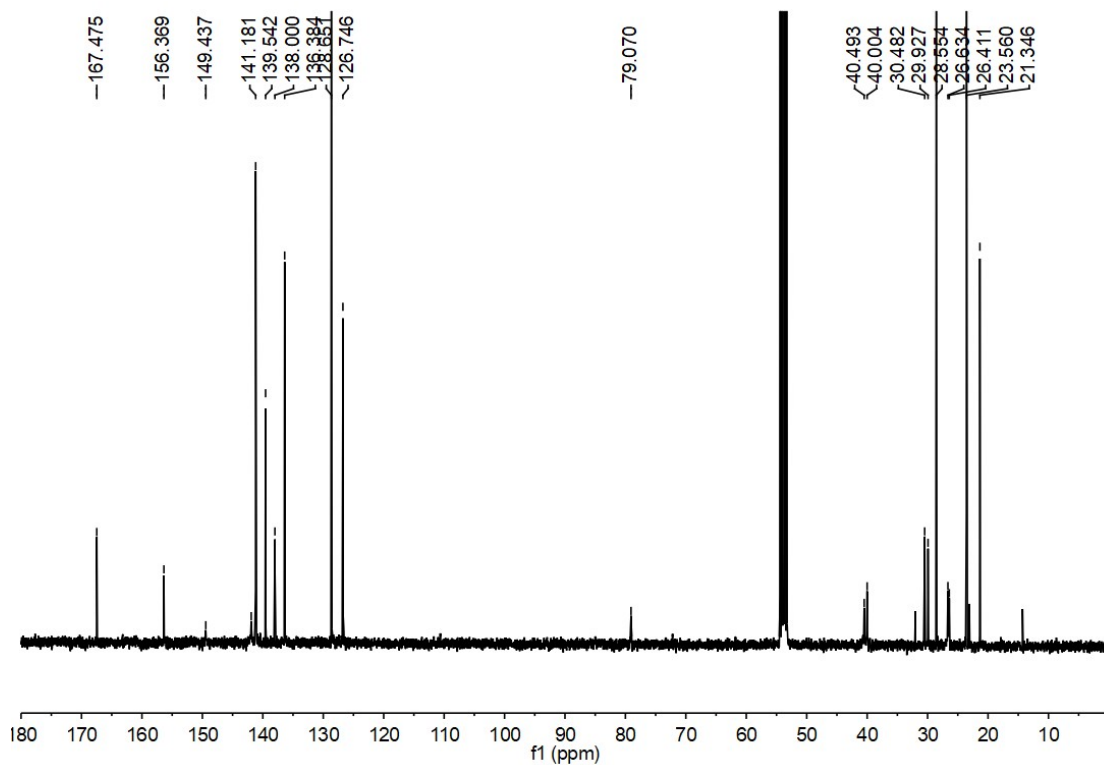

Figure S7. <sup>13</sup>C NMR (101 MHz, CD<sub>2</sub>Cl<sub>2</sub>) spectrum of **1-2**.

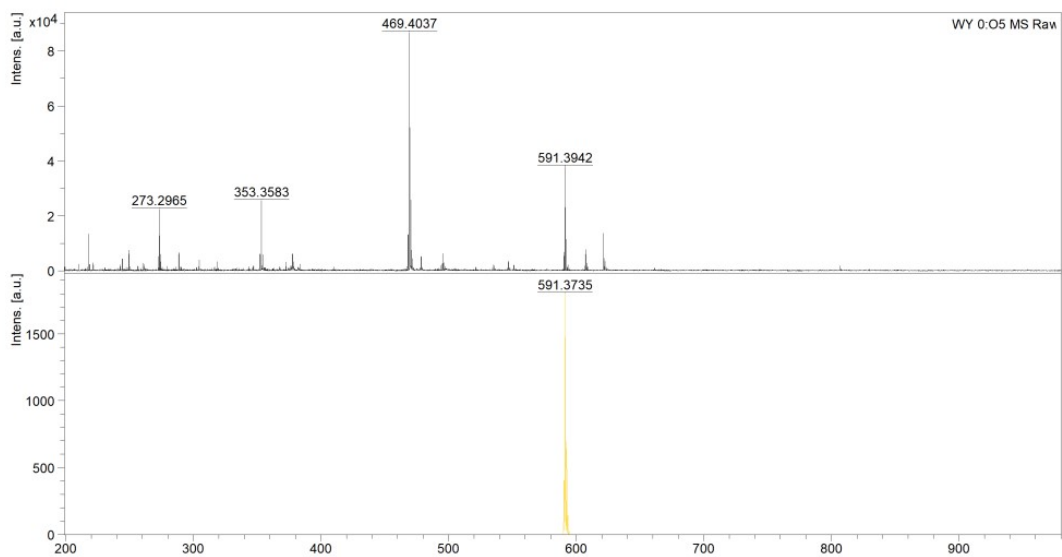

Figure S8. HRMS spectrum for **1-2**.

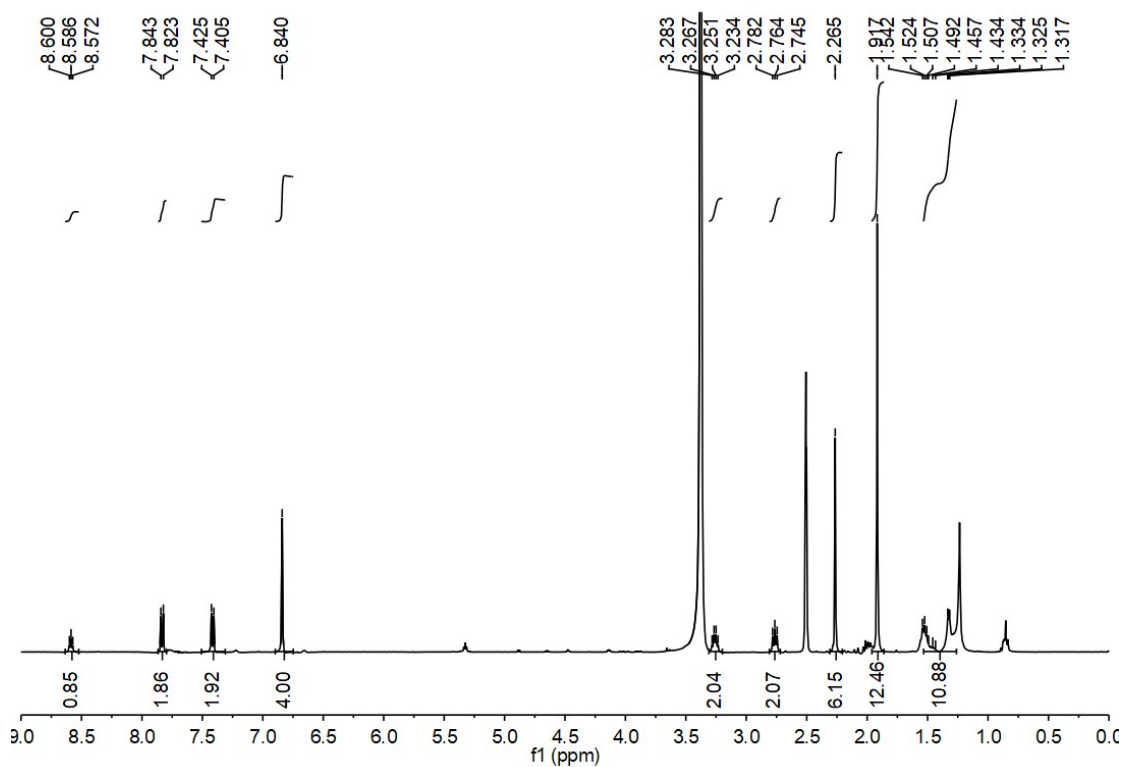

Figure S9. <sup>1</sup>H NMR (400 MHz, DMSO) spectrum of **C6B**.

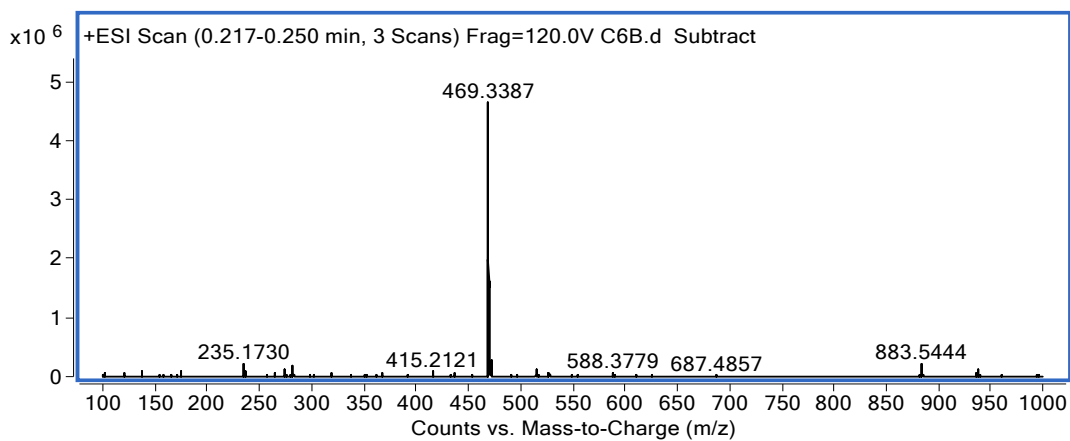

Figure S10. HRMS spectrum for **C6B**.

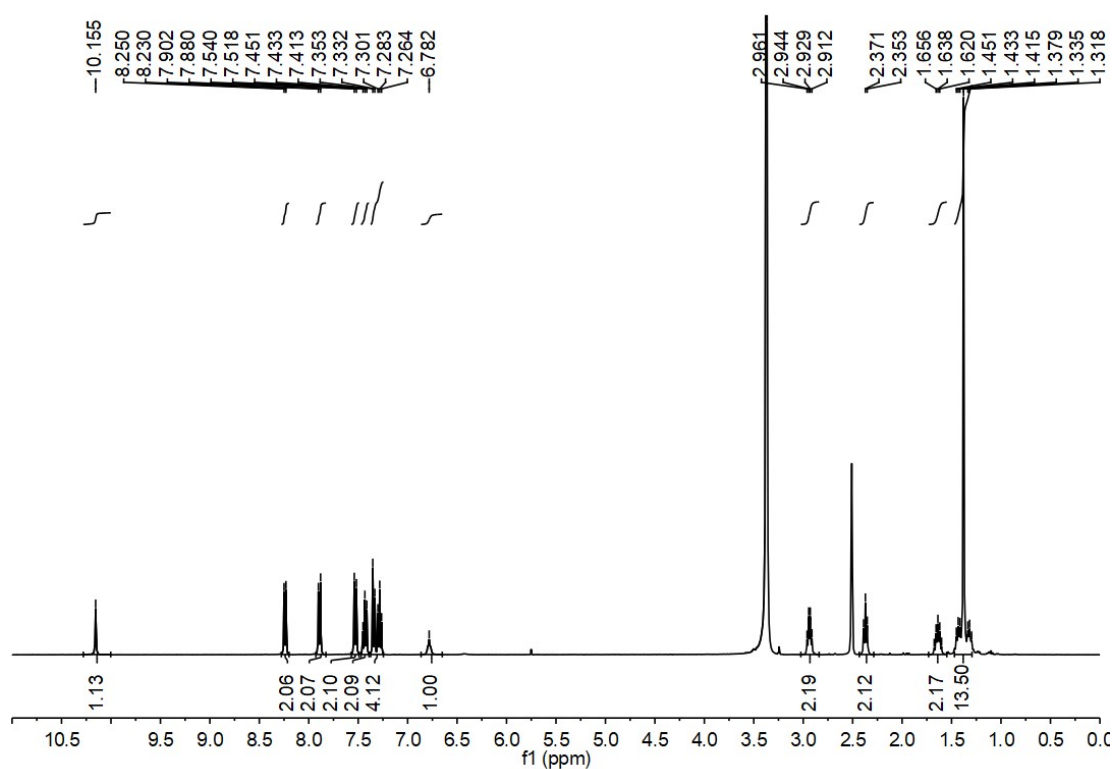

Figure S11. <sup>1</sup>H NMR (400 MHz, DMSO) spectrum of **2-2**.

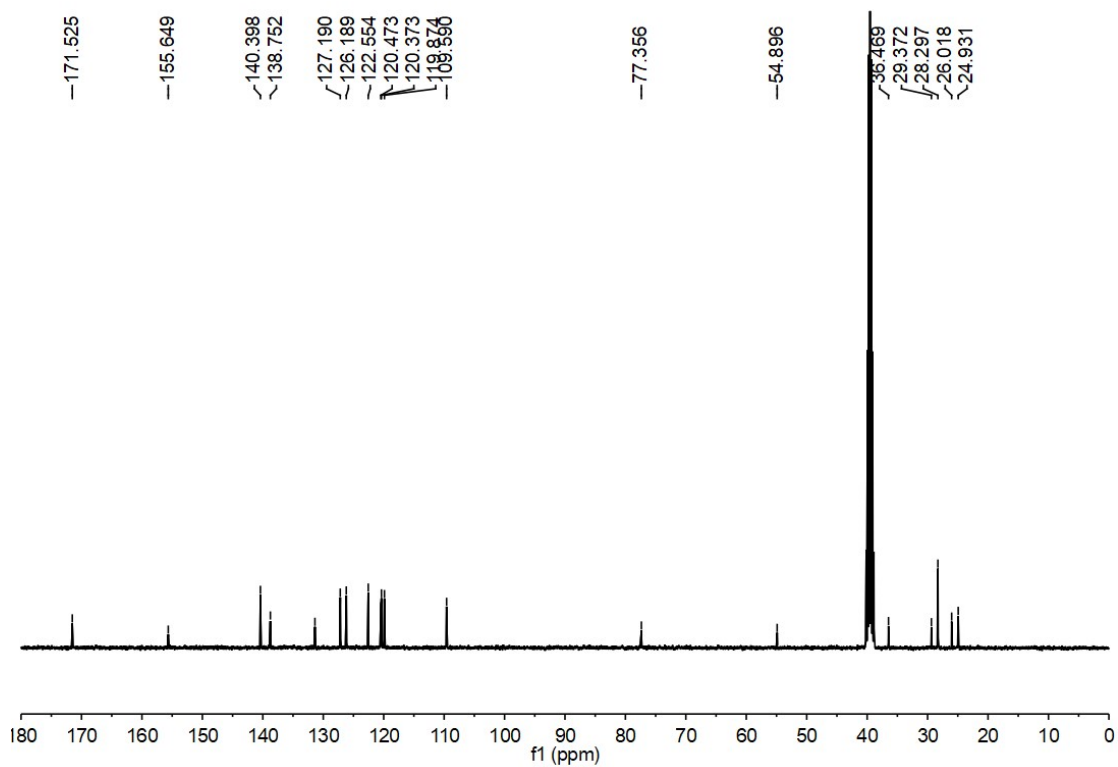

Figure S12. <sup>13</sup>C NMR (101 MHz, DMSO) spectrum of **2-2**.

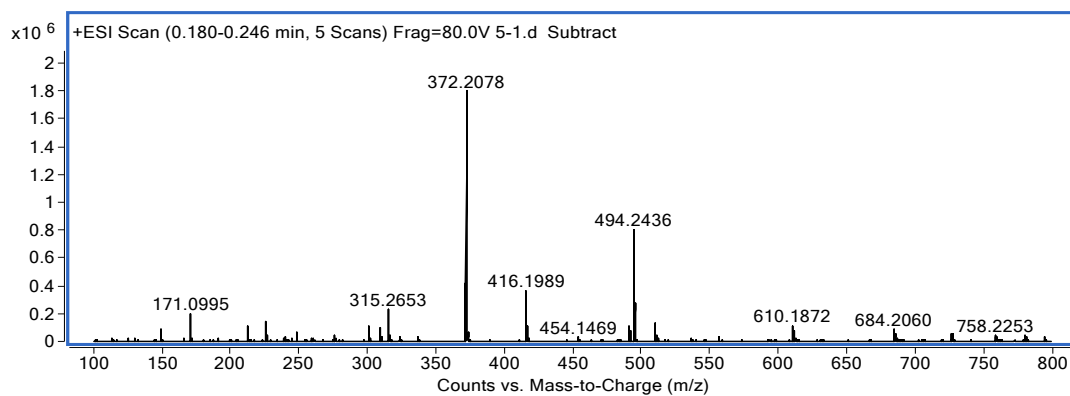

Figure S13. HRMS spectrum for **2-2**.



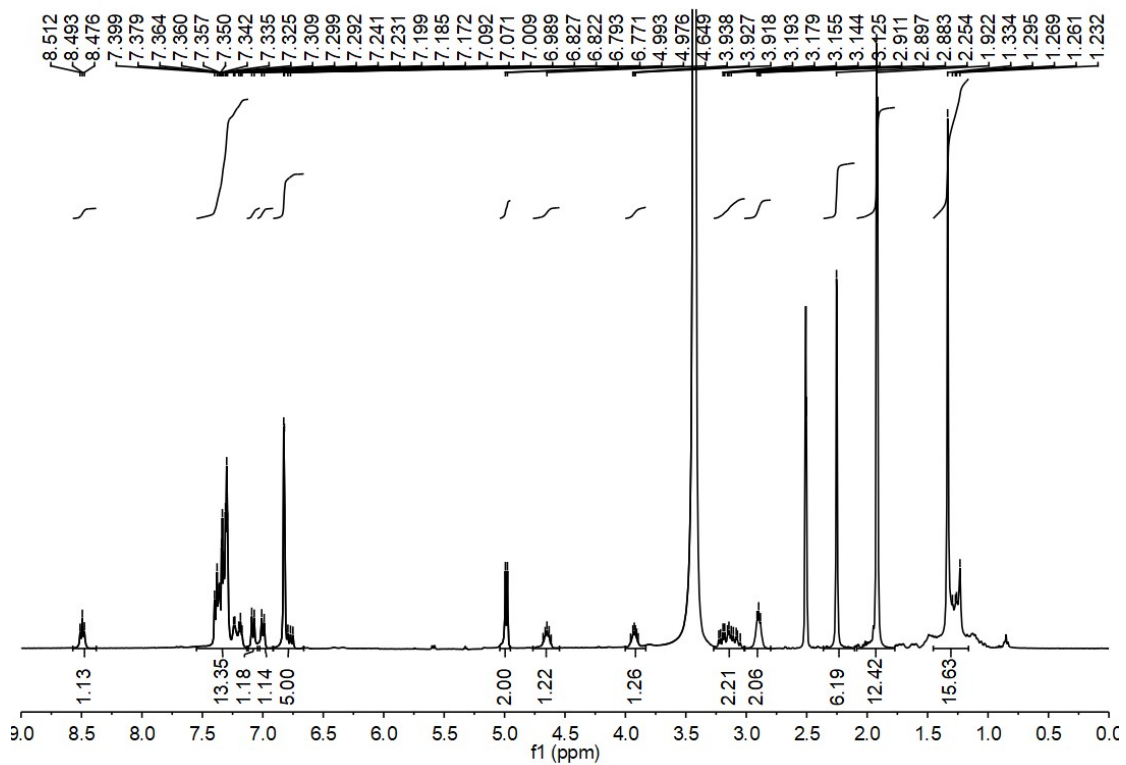

Figure S14.  $^1\text{H}$  NMR (400 MHz, DMSO) spectrum of **B1**.

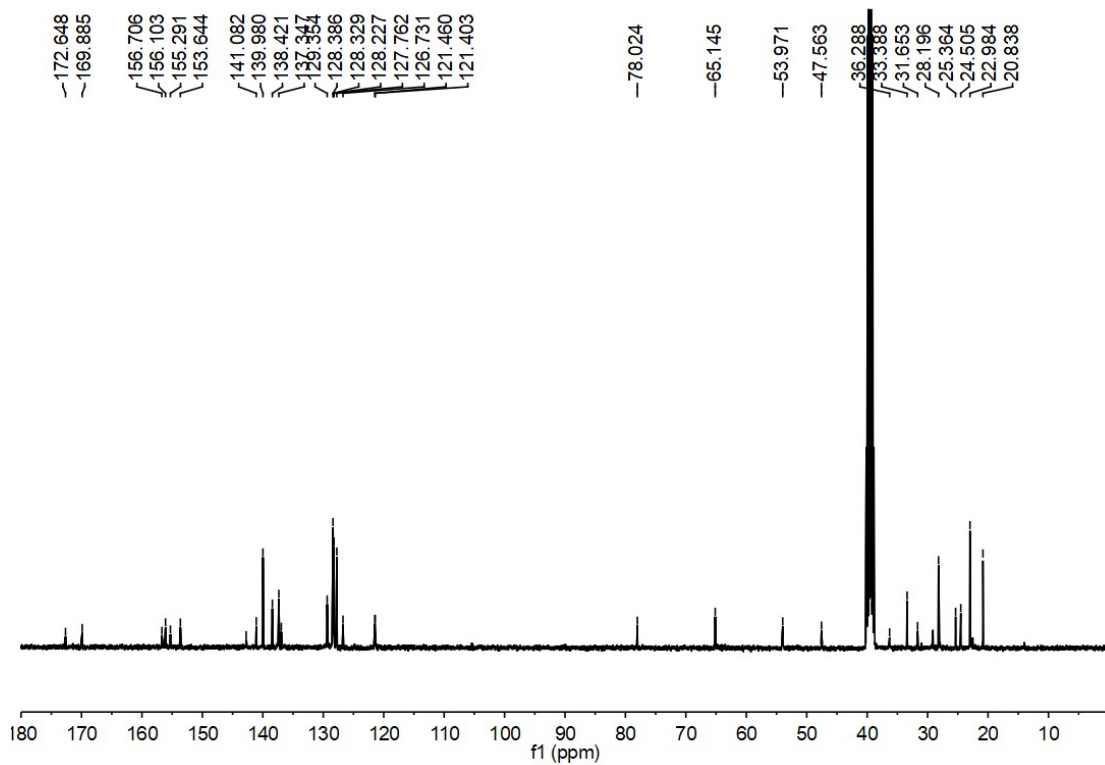

Figure S15.  $^{13}\text{C}$  NMR (101 MHz, DMSO) spectrum of **B1**.

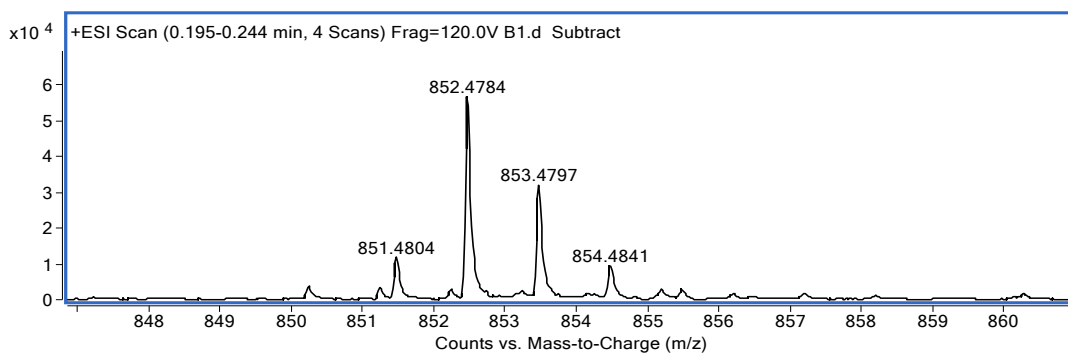

Figure S16. HRMS spectrum for **B1**.

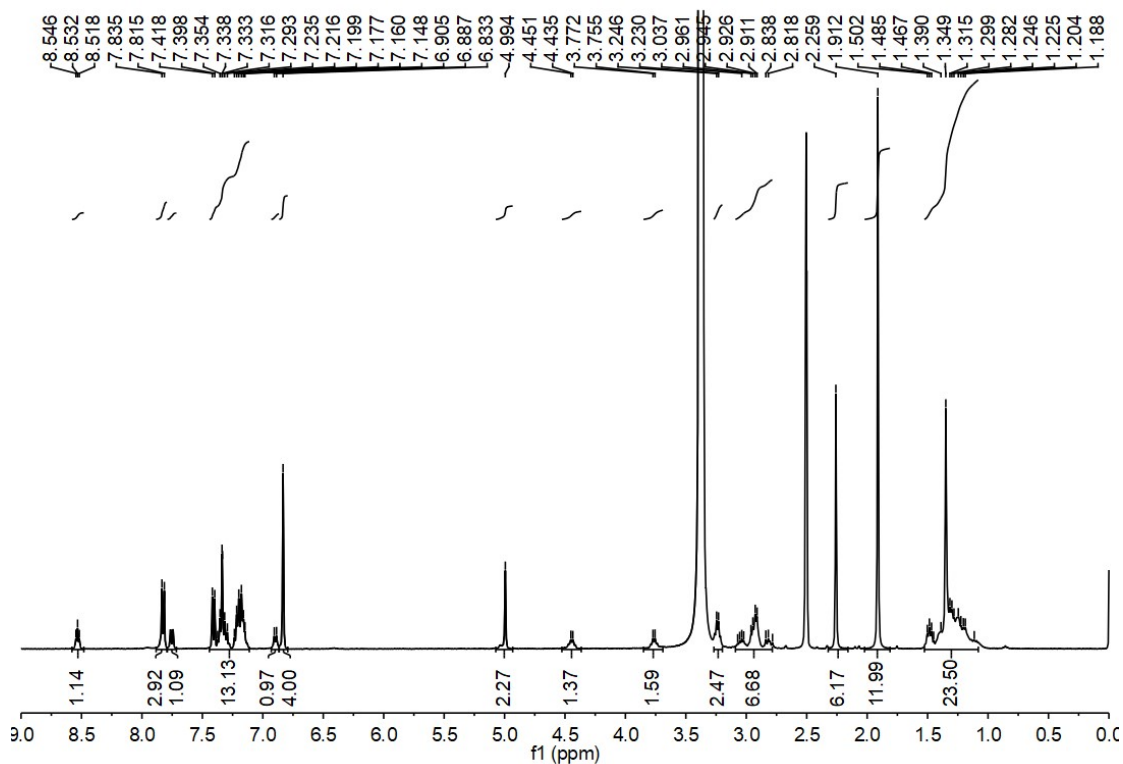

Figure S17. <sup>1</sup>H NMR (400 MHz, DMSO) spectrum of **B2**.

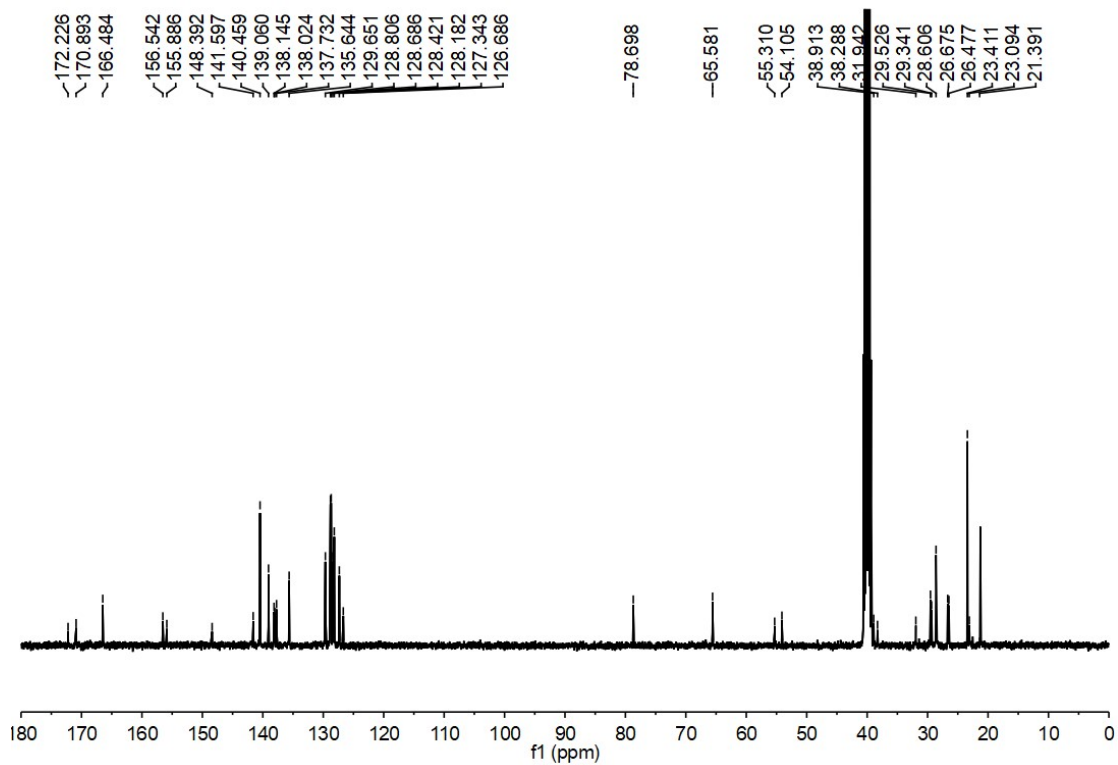

Figure S18.  $^{13}\text{C}$  NMR (101 MHz, DMSO) spectrum of **B2**.

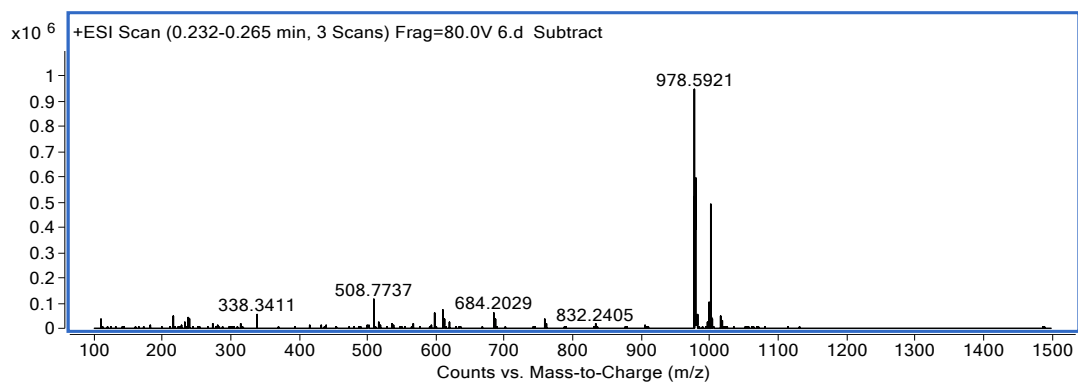

Figure S19. HRMS spectrum of **B2**.

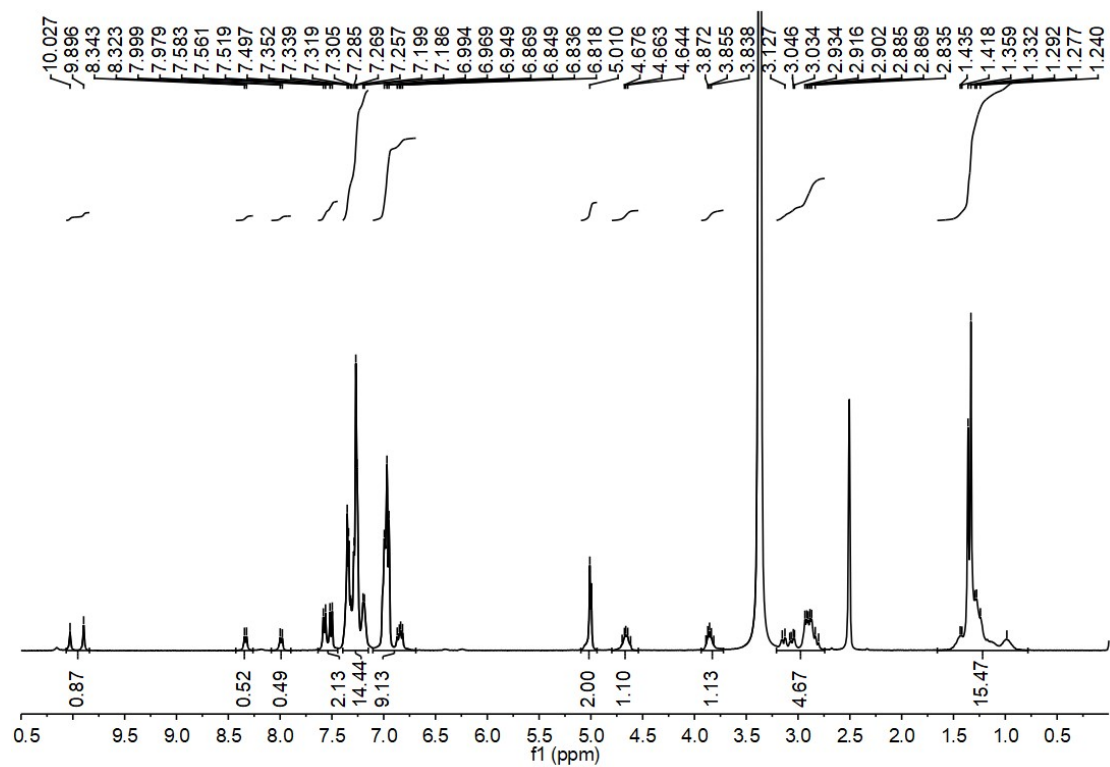

Figure S20.  $^1\text{H}$  NMR (400 MHz, DMSO) spectrum of N1.

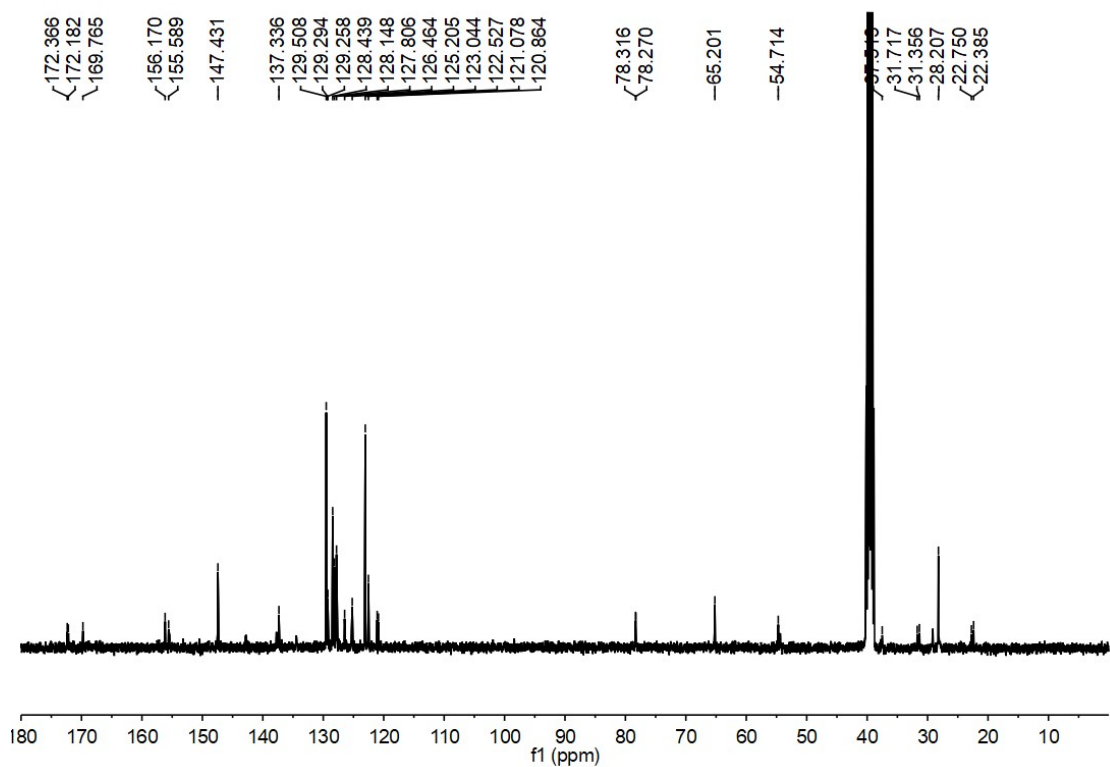

Figure S21.  $^{13}\text{C}$  NMR (101 MHz, DMSO) spectrum of N1.

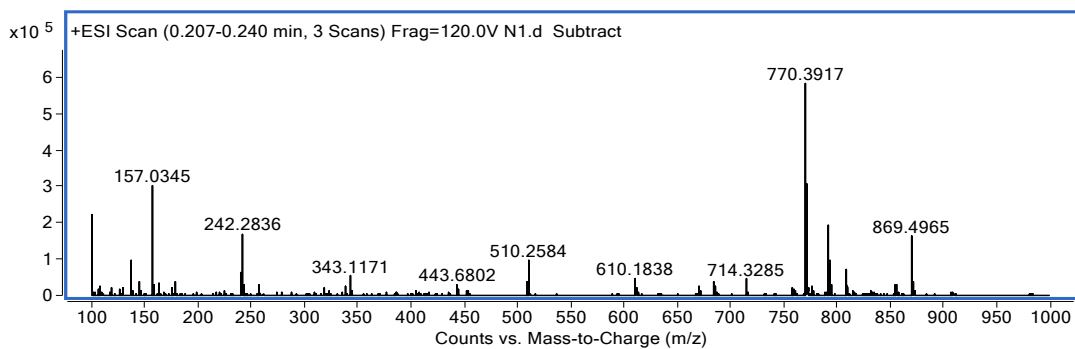

Figure S22. HRMS spectrum of N1.

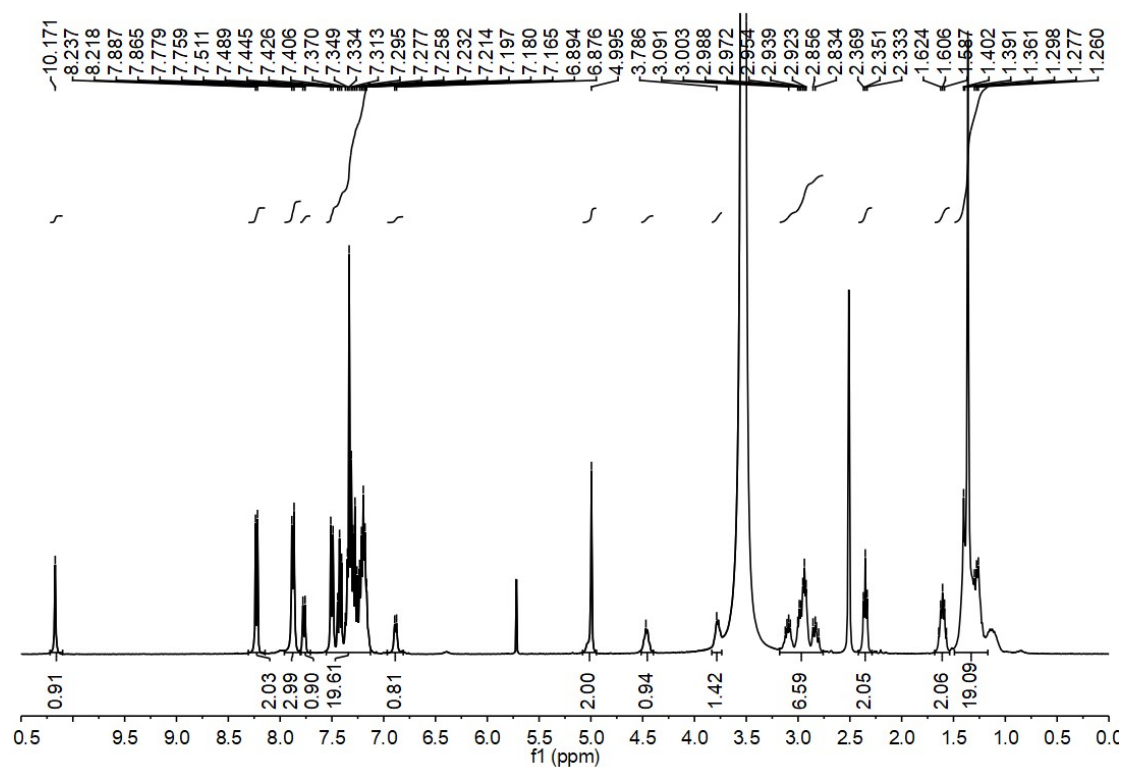

Figure S23. <sup>1</sup>H NMR (400 MHz, DMSO) spectrum of N2

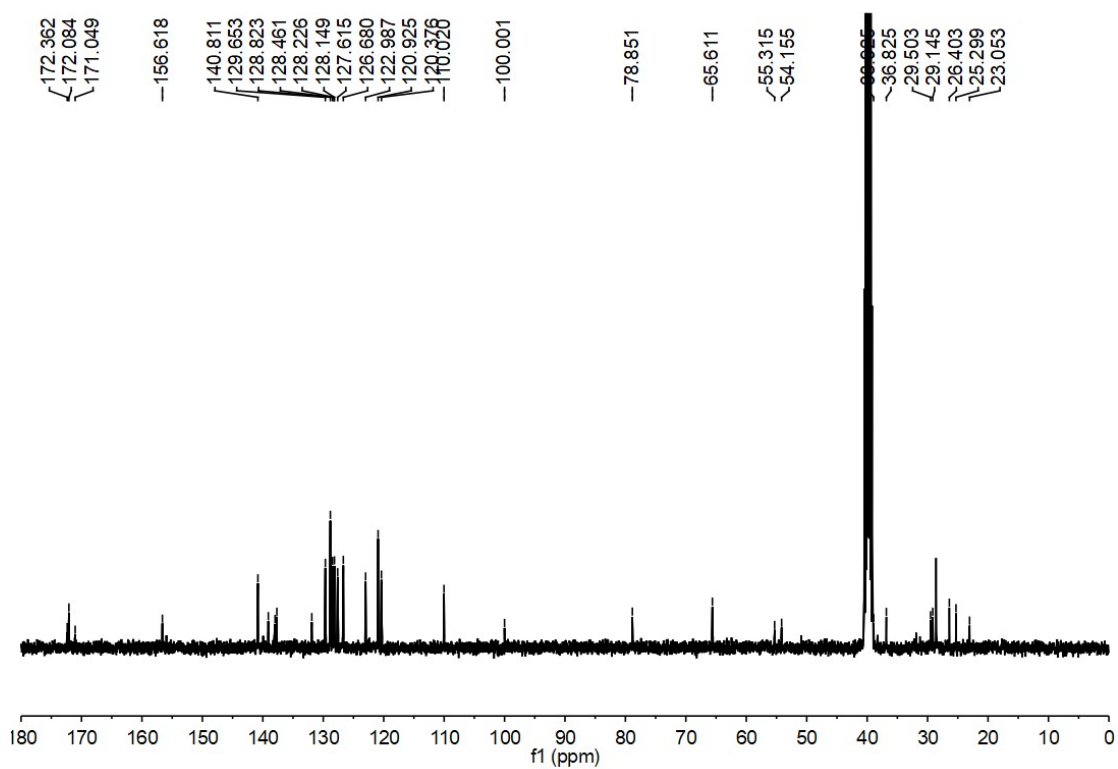

Figure S24.  $^{13}\text{C}$  NMR (101 MHz, DMSO) spectrum of N2.

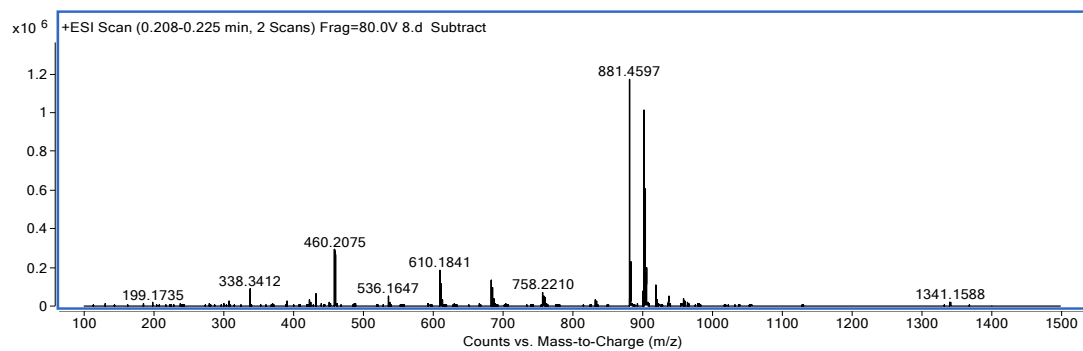

Figure S25. HRMS spectrum of N2.

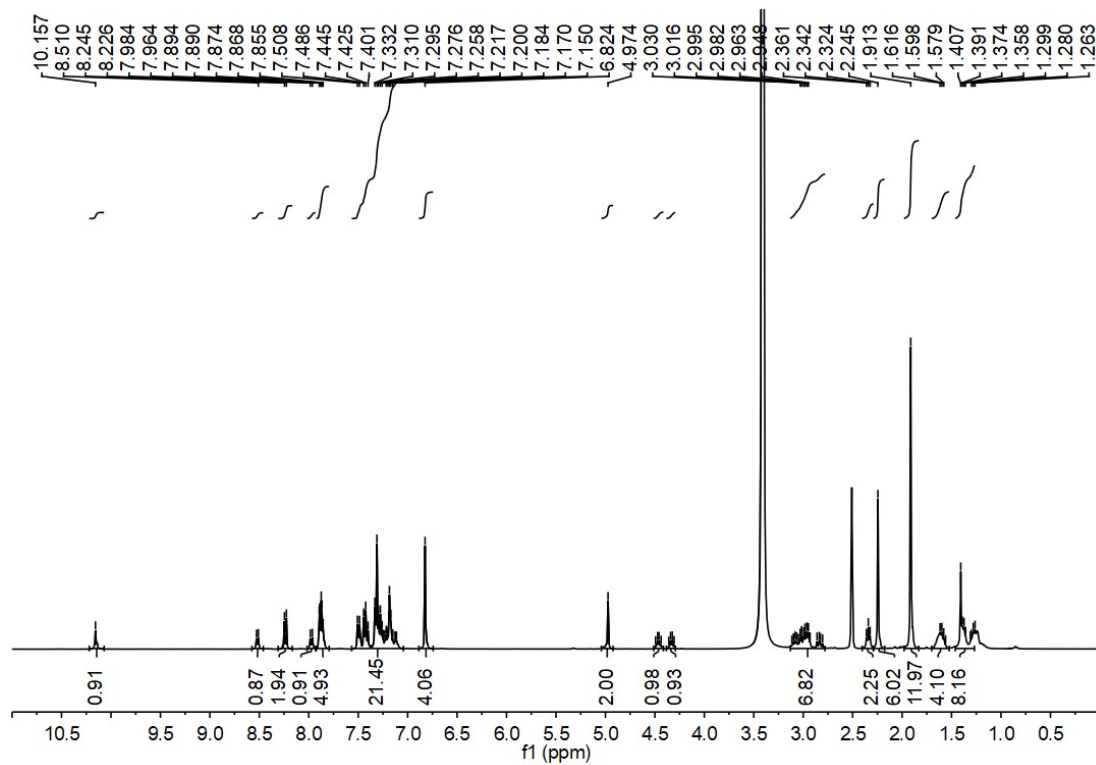

Figure S26.  $^1\text{H}$  NMR (400 MHz, DMSO) spectrum of **BN**.

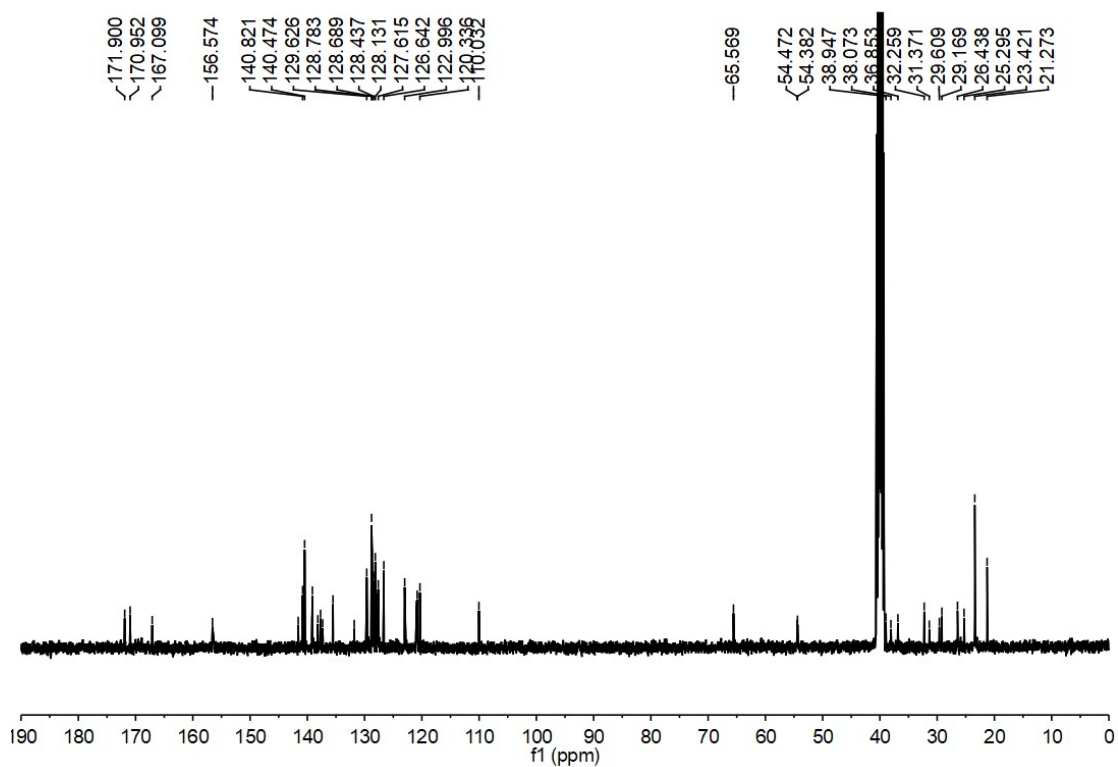

Figure S27.  $^{13}\text{C}$  NMR (101 MHz, DMSO) spectrum of **BN**.

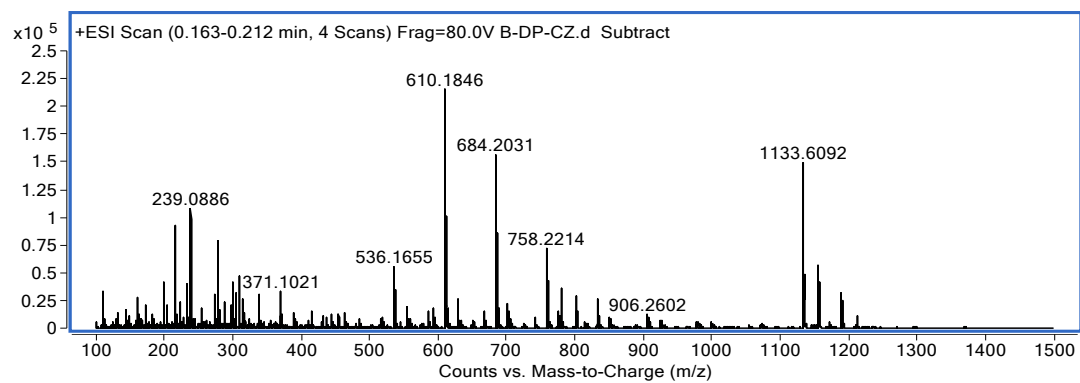

Figure S28. HRMS spectrum for **BN**.
